# Supplementary material for: Ligufalimab, a novel anti-CD47 antibody with no hemagglutination demonstrates both monotherapy and combo antitumor activity
Source: PubMed Central journal article supplement — J Immunother Cancer. 2022 Nov 30;10(11):e005517. doi: 10.1136/jitc-2022-005517 (PMC9717234; doi:10.1136/jitc-2022-005517), 2022-11-30
Supplement: jitc-2022-005517supp002.pdf [file jitc-2022-005517supp002.pdf]

## Supplementary Materials

### Supplementary Figure S1

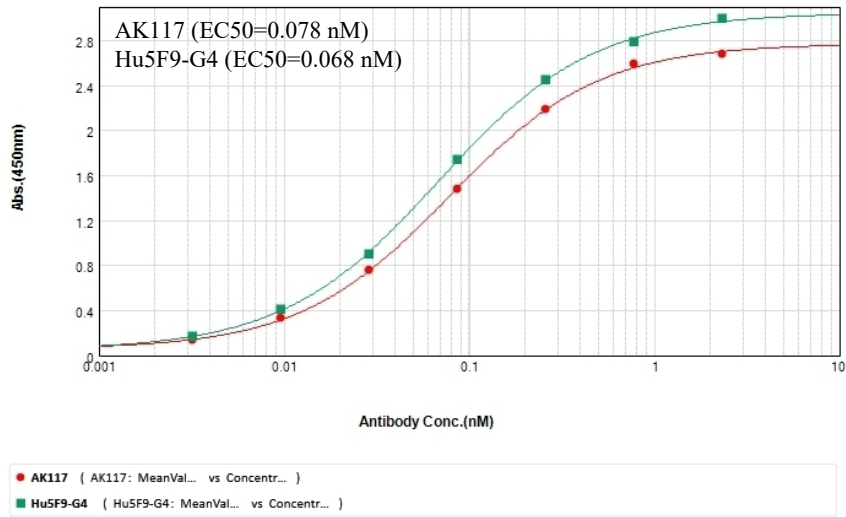

#### Supplementary Figure S1. Binding activity of AK117 with CD47.

Binding of AK117 to recombinant ECD of human CD47 was tested by ELISA.

## Supplementary Figure S2

A

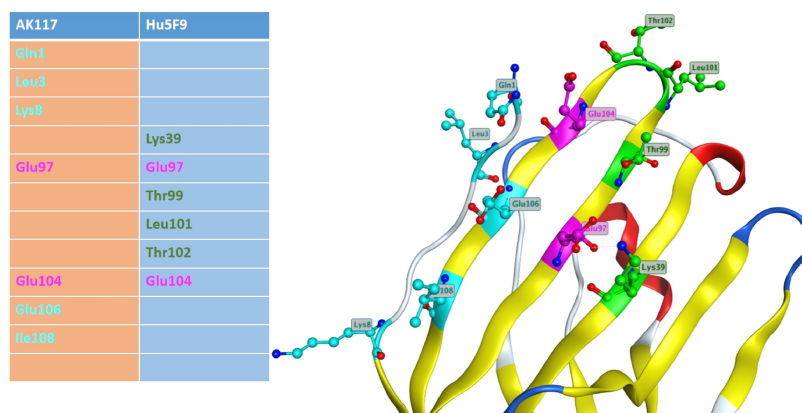

B

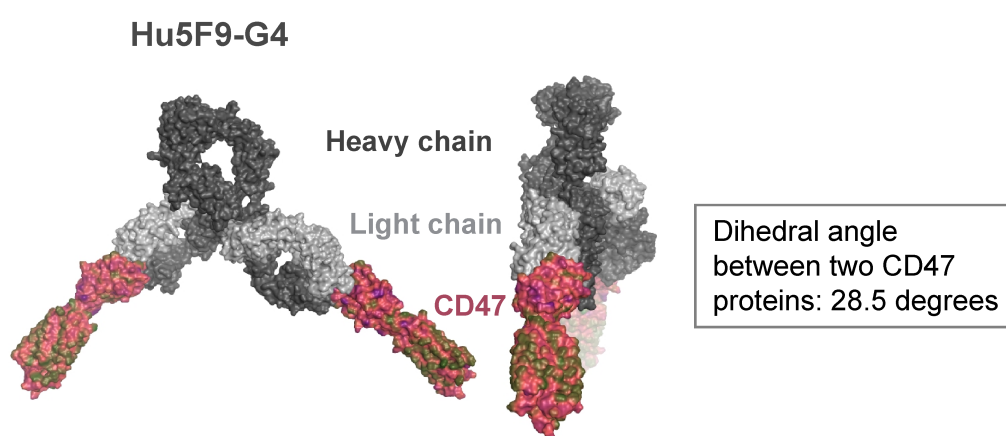

C

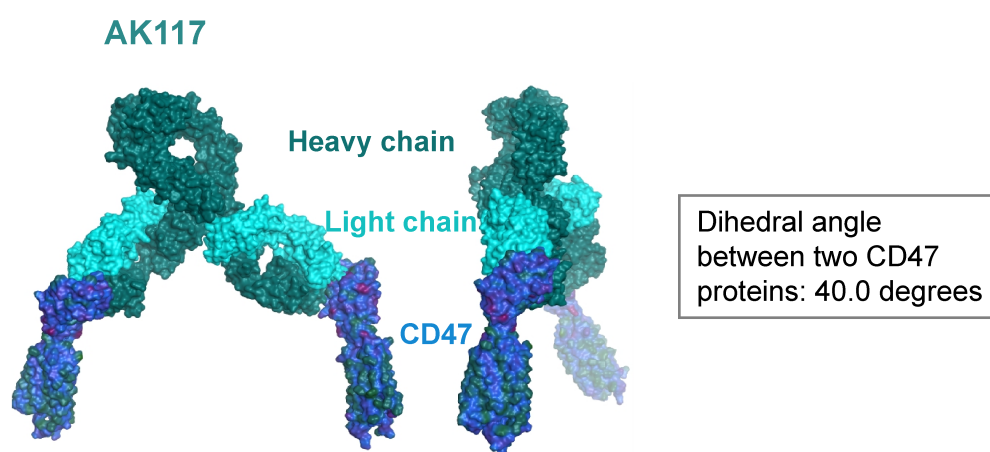

**Supplementary Figure S2. Simulation of AK117/CD47 structure.** (A) Overlapped residues within the binding epitopes of AK117 and Hu5F9-G4 on CD47. (B) Different views of Hu5F9-G4/CD47 structure with a dihedral angle of 28.5 degrees. (C) Different views of AK117/CD47 complex with a dihedral angle of 40.0 degrees.

## Supplementary Figure S3

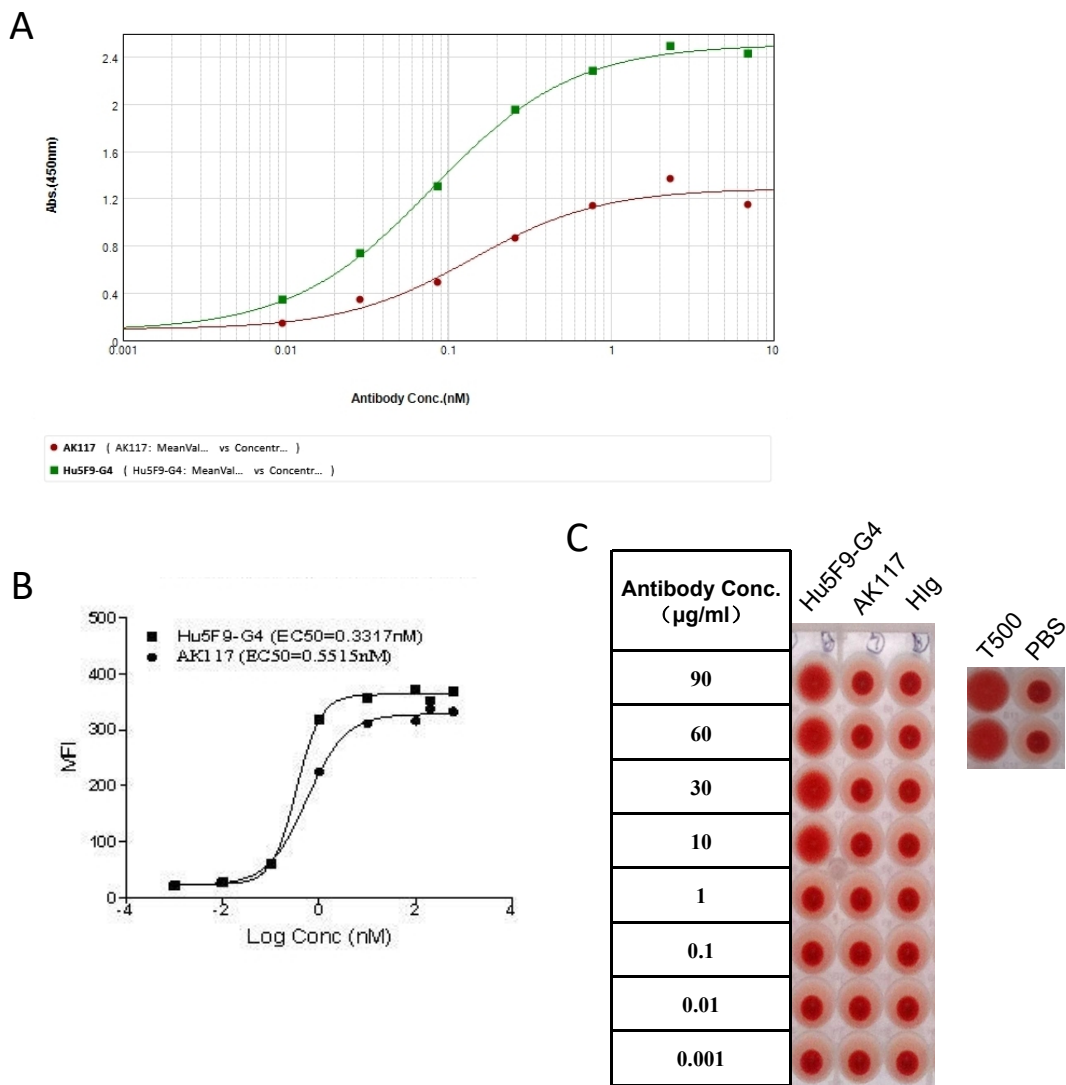

**Supplementary Figure S3. AK117 bound to cynomolgus monkey CD47 with no hemagglutination of cynomolgus RBCs.** (A) Binding activity of AK117 to cynomolgus monkey CD47 protein was examined by ELISA. (B) Binding activity of AK117 or Hu5F9-G4 to cynomolgus monkey RBCs was determined by FACS. (C) AK117 does not induce hemagglutination of cynomolgus monkey RBCs, but Hu5F9-G4 does.

**Supplementary Table S1.** Hematological parameters in cynomolgus monkeys with different doses of AK117.

**A**

| Group |                       | Dose of AK117 (mg/kg) | Concentration of AK117 (mg/ml) | Number of cynomolgus monkey | Identification No. of cynomolgus monkeys |         |
|-------|-----------------------|-----------------------|--------------------------------|-----------------------------|------------------------------------------|---------|
|       |                       |                       |                                |                             | Male                                     | Female  |
| 1     | Vehicle control group | 0                     | 0                              | 1                           | 1811381                                  | 1811382 |
| 2     | Low-dose group        | 10                    | 1                              | 1                           | 1811383                                  | 1811384 |
| 3     | Medium-dose group     | 30                    | 3                              | 1                           | 1811385                                  | 1811386 |
| 4     | High-dose group       | 100                   | 10                             | 1                           | 1811387                                  | 1811388 |

Experimental design: 1 cynomolgus monkey/sex/group, single-dose intravenous injection at Day 1, euthanization at Day 15.

**B**

| <b>1811381</b> | RBC ( $\times 10^{12}/L$ ) | Hemoglobin (g/L) | Hematocrit (%) | Reticulocyte ( $\times 10^{12}/L$ ) | <b>1811382</b> | RBC ( $\times 10^{12}/L$ ) | Hemoglobin (g/L) | Hematocrit (%) | Reticulocyte ( $\times 10^{12}/L$ ) |
|----------------|----------------------------|------------------|----------------|-------------------------------------|----------------|----------------------------|------------------|----------------|-------------------------------------|
| Day-1          | 5.87                       | 135              | 41.2           | 0.079                               | Day-1          | 5.29                       | 119              | 38.9           | 0.061                               |
| Day1           | 5.47                       | 126              | 38.8           | 0.08                                | Day1           | 5.17                       | 116              | 38.7           | 0.074                               |
| Day2           | 5.5                        | 130              | 38.7           | 0.072                               | Day2           | 5.65                       | 128              | 41.5           | 0.077                               |
| Day3           | 5.7                        | 136              | 40.4           | 0.087                               | Day3           | 5.17                       | 117              | 38.2           | 0.057                               |
| Day5           | 5.96                       | 152              | 42.9           | 0.123                               | Day5           | 4.76                       | 116              | 35.9           | 0.065                               |
| Day8           | 5.62                       | 131              | 41.1           | 0.163                               | Day8           | 4.69                       | 106              | 36.2           | 0.162                               |
| Day11          | 5.2                        | 120              | 37.4           | 0.177                               | Day11          | 4.94                       | 111              | 38.6           | 0.185                               |
| Day15          | 5.64                       | 135              | 41.1           | 0.171                               | Day15          | 5.23                       | 122              | 40.1           | 0.16                                |

  

| <b>1811383</b> | RBC ( $\times 10^{12}/L$ ) | Hemoglobin (g/L) | Hematocrit (%) | Reticulocyte ( $\times 10^{12}/L$ ) | <b>1811384</b> | RBC ( $\times 10^{12}/L$ ) | Hemoglobin (g/L) | Hematocrit (%) | Reticulocyte ( $\times 10^{12}/L$ ) |
|----------------|----------------------------|------------------|----------------|-------------------------------------|----------------|----------------------------|------------------|----------------|-------------------------------------|
| Day-1          | 5.66                       | 133              | 43.1           | 0.09                                | Day-1          | 5.03                       | 120              | 39.6           | 0.051                               |
| Day1           | 5.05                       | 119              | 38.6           | 0.081                               | Day1           | 4.52                       | 109              | 36             | 0.07                                |
| Day2           | 5.48                       | 128              | 41.2           | 0.073                               | Day2           | 4.79                       | 117              | 37.3           | 0.064                               |
| Day3           | 4.98                       | 116              | 37.1           | 0.082                               | Day3           | 5                          | 121              | 39             | 0.093                               |
| Day5           | 5.26                       | 128              | 38.7           | 0.107                               | Day5           | 3.89                       | 98               | 30             | 0.095                               |
| Day8           | 4.97                       | 116              | 36.4           | 0.252                               | Day8           | 4.01                       | 95               | 31.8           | 0.261                               |
| Day11          | 5.07                       | 117              | 39.1           | 0.315                               | Day11          | 4.23                       | 105              | 34.6           | 0.438                               |
| Day15          | 5.37                       | 130              | 42.4           | 0.282                               | Day15          | 4.64                       | 115              | 38.4           | 0.234                               |

  

| <b>1811385</b> | RBC ( $\times 10^{12}/L$ ) | Hemoglobin (g/L) | Hematocrit (%) | Reticulocyte ( $\times 10^{12}/L$ ) | <b>1811386</b> | RBC ( $\times 10^{12}/L$ ) | Hemoglobin (g/L) | Hematocrit (%) | Reticulocyte ( $\times 10^{12}/L$ ) |
|----------------|----------------------------|------------------|----------------|-------------------------------------|----------------|----------------------------|------------------|----------------|-------------------------------------|
| Day-1          | 6.22                       | 137              | 46             | 0.064                               | Day-1          | 6.05                       | 123              | 40.8           | 0.126                               |
| Day1           | 5.42                       | 119              | 40.1           | 0.04                                | Day1           | 5.52                       | 112              | 37.2           | 0.148                               |
| Day2           | 5.89                       | 129              | 43.4           | 0.035                               | Day2           | 6.29                       | 125              | 42.1           | 0.096                               |
| Day3           | 5.28                       | 115              | 39.6           | 0.038                               | Day3           | 5.76                       | 117              | 38.9           | 0.069                               |
| Day5           | 5.22                       | 115              | 39.8           | 0.058                               | Day5           | 5.41                       | 112              | 36.8           | 0.078                               |
| Day8           | 5.13                       | 113              | 38.6           | 0.28                                | Day8           | 4.84                       | 99               | 33.9           | 0.288                               |
| Day11          | 5.13                       | 112              | 37.7           | 0.325                               | Day11          | 4.48                       | 91               | 31             | 0.351                               |
| Day15          | 5.41                       | 123              | 41.4           | 0.195                               | Day15          | 5.19                       | 110              | 36.6           | 0.385                               |

  

| <b>18113837</b> | RBC ( $\times 10^{12}/L$ ) | Hemoglobin (g/L) | Hematocrit (%) | Reticulocyte ( $\times 10^{12}/L$ ) | <b>1811388</b> | RBC ( $\times 10^{12}/L$ ) | Hemoglobin (g/L) | Hematocrit (%) | Reticulocyte ( $\times 10^{12}/L$ ) |
|-----------------|----------------------------|------------------|----------------|-------------------------------------|----------------|----------------------------|------------------|----------------|-------------------------------------|
| Day-1           | 5.52                       | 123              | 40.9           | 0.084                               | Day-1          | 6.66                       | 140              | 48.1           | 0.082                               |
| Day1            | 4.92                       | 112              | 36.7           | 0.086                               | Day1           | 6.01                       | 127              | 44.9           | 0.1                                 |
| Day2            | 5.23                       | 119              | 38.4           | 0.071                               | Day2           | 6.52                       | 137              | 47.6           | 0.079                               |
| Day3            | 5.18                       | 118              | 38.5           | 0.09                                | Day3           | 5.91                       | 125              | 42.7           | 0.085                               |
| Day5            | 4.36                       | 100              | 31.7           | 0.133                               | Day5           | 4.59                       | 98               | 32.4           | 0.121                               |
| Day8            | 4.26                       | 96               | 30.7           | 0.3                                 | Day8           | 4.87                       | 103              | 35.9           | 0.472                               |
| Day11           | 4.24                       | 98               | 33             | 0.448                               | Day11          | 4.45                       | 100              | 34.7           | 0.578                               |
| Day15           | 4.65                       | 111              | 36.2           | 0.35                                | Day15          | 5.19                       | 118              | 42.7           | 0.516                               |

Time points of blood collection: D-1, 2-4 h after administration at D1, D2, D3, D5, D8, D11 and D15. The hematological parameters monitored in individual cynomolgus monkeys: RBC, hemoglobin, hematocrit and reticulocyte.
